# Supplementary material
Source: PubMed Central journal article supplement (PMC4754550)
Supplement: mt2015188x1.pdf [file mt2015188x1.pdf]

a

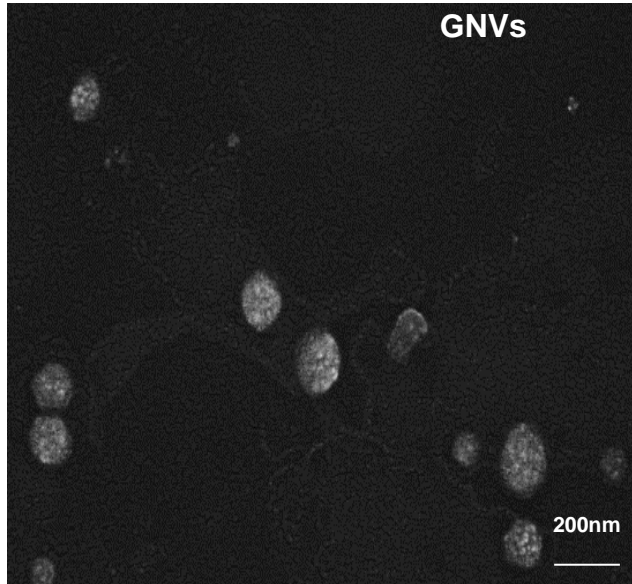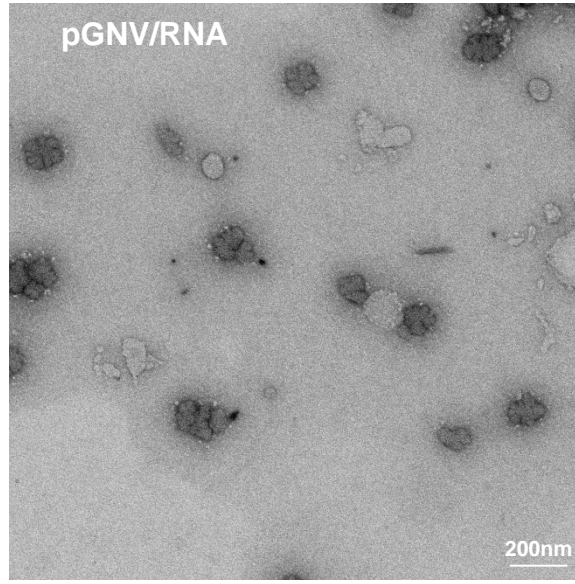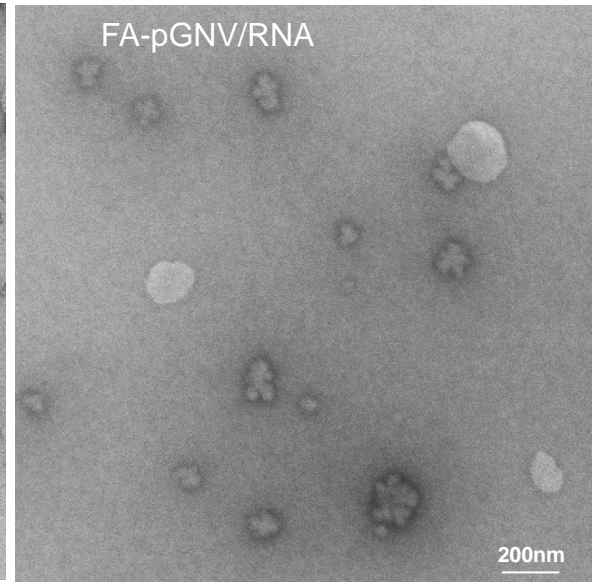

b

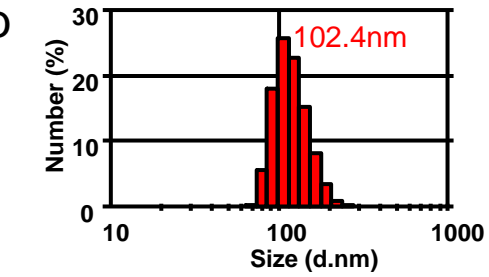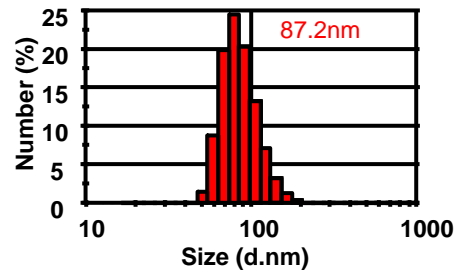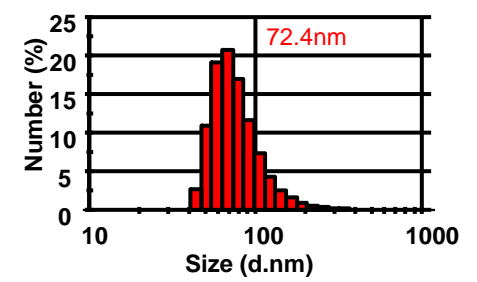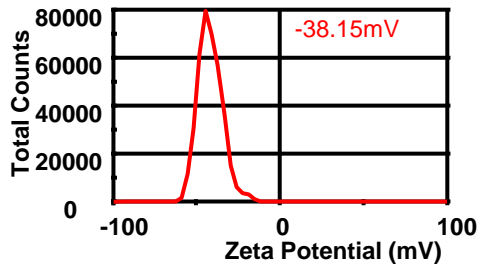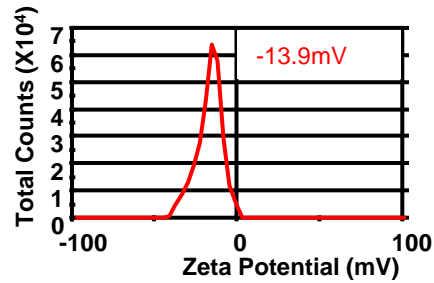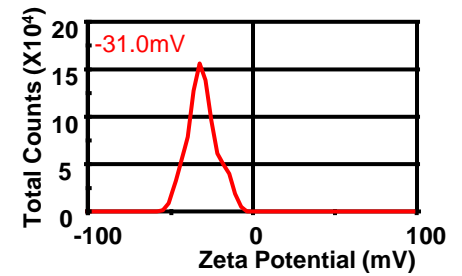

Supplemental Fig. 1

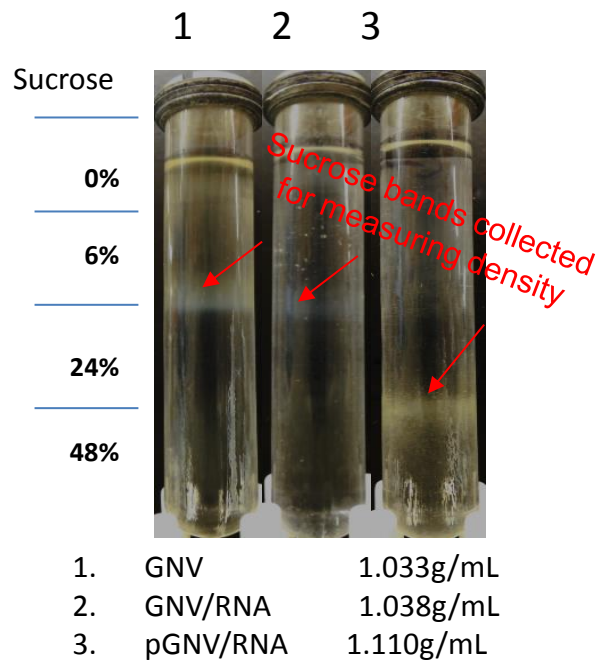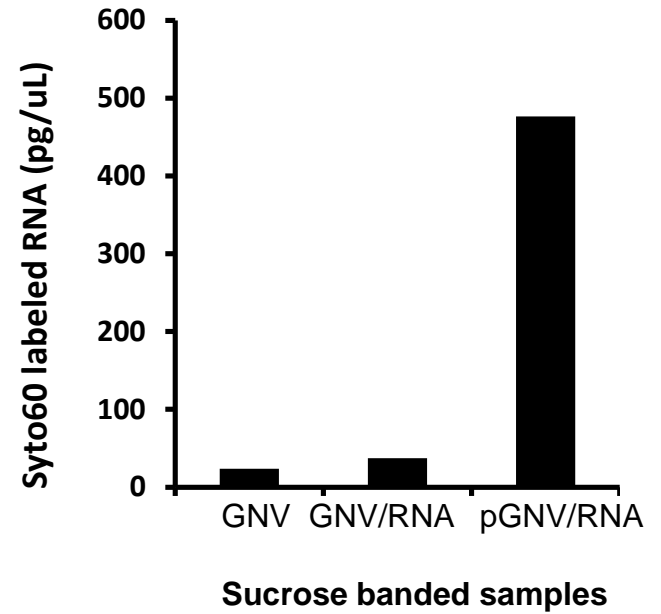

Supplemental Fig. 2

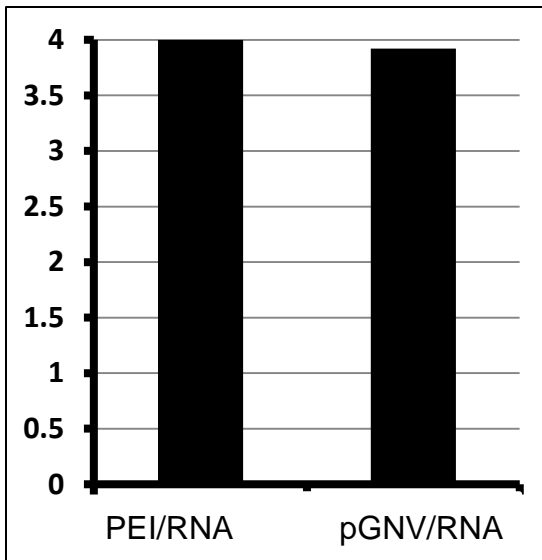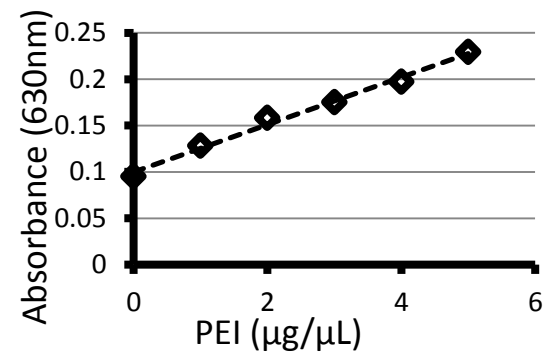

Supplemental Fig. 3

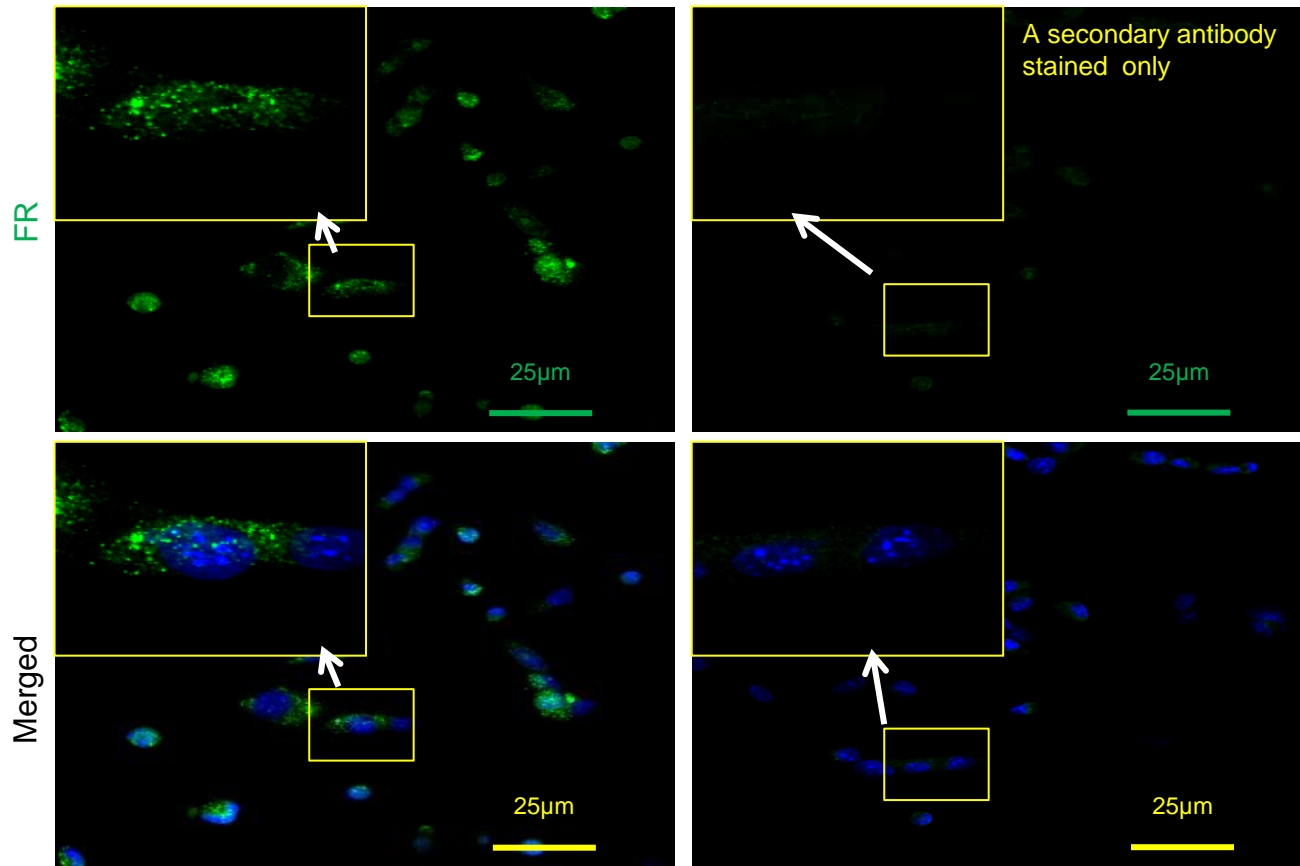

Supplemental Figure 4

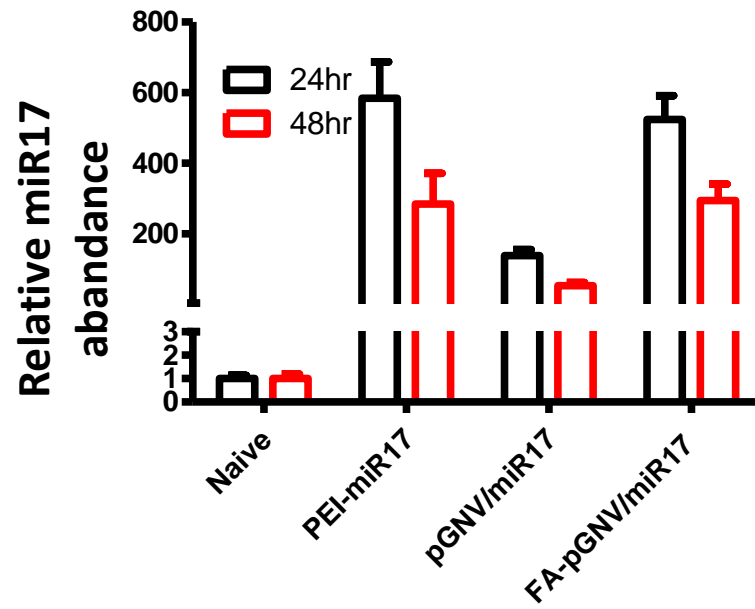

Supplementary figure 5

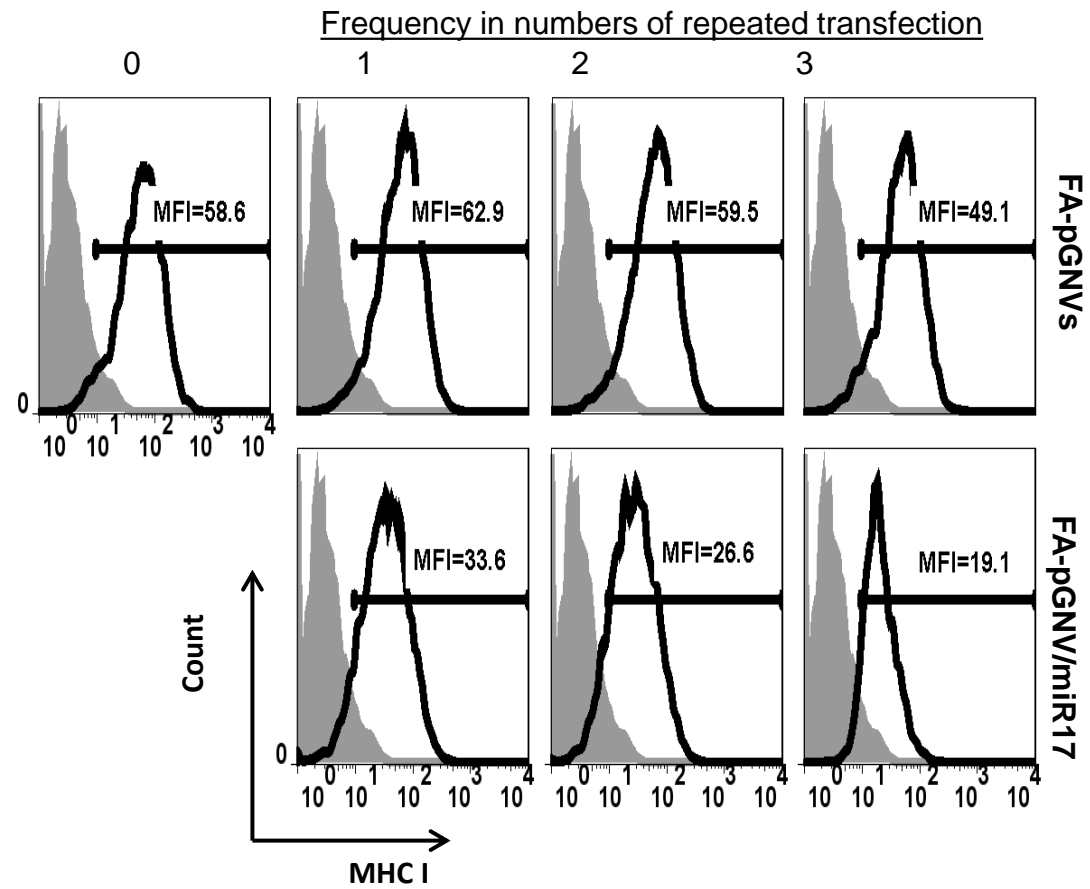

Supplemental figure 6
